# Supplementary material
Source: PubMed Central journal article supplement (PMC5350961)
Supplement: CTS-6-463-s002.pdf [file CTS-6-463-s002.pdf]

**Supplemental Table 1. Differentially abundant or nitrosylated proteins in skeletal muscle biopsy samples.**

| No. | Protein name                                            | Accession <sup>#</sup> | Gel Spot No. | pI   | MW (kD) | MS ID Expectation Value | Protein Score | Abundance Ratio | p-Value |         | Ratio of Ratios |
|-----|---------------------------------------------------------|------------------------|--------------|------|---------|-------------------------|---------------|-----------------|---------|---------|-----------------|
|     |                                                         |                        |              |      |         |                         |               |                 | Asc-    | Asc+    |                 |
| 1   | Aconitate hydratase, mitochondrial                      | Q99798                 | 2006         | 7.44 | 86      | <b>6.29E-05</b>         | 85            | 1.03            | 0.01612 | 0.99352 | -1.54           |
| 2   | Actin, alpha cardiac muscle 1                           | P68032                 | 1043         | 5.63 | 300     | <b>1.58E-15</b>         | 191           | 1.4             | 0.01977 | 0.25189 | 1.54            |
| 3   | Actin, alpha skeletal muscle                            | P68133                 | 1081         | 5.68 | 200     | <b>5.00E-41</b>         | 446           | 2.11            | 0.97017 | 0.01293 | -2.22           |
| 4   | Actin, aortic smooth muscle                             | P62736                 | 1047         | 5.94 | 300     | <b>1.99E-05</b>         | 90            | 1.91            | 0.53328 | 0.00717 | -1.66           |
| 5   | Actin, gamma-enteric smooth muscle                      | E9PG30                 | 383          | 3.23 | 18      | <b>1.26E-04</b>         | 88            | 2.33            | 0.29908 | 0.00774 | -1.49           |
| 6   | ATP synthase subunit alpha                              | A8K092                 | 1037         | 5.97 | 300     | <b>1.99E-42</b>         | 466           | 1.53            | 0.68164 | 0.03628 | -1.31           |
| 7   | ATP synthase subunit beta, mitochondrial                | P06576                 | 199          | 4.43 | 50      | <b>1.26E-56</b>         | 602           | -1.52           | 0.5741  | 0.03756 | 1.82            |
| 8   | Beta-enolase                                            | P13929                 | 1328         | 6.19 | 47      | <b>1.26E-05</b>         | 92            | 1.59            | 0.86688 | 0.03349 | -1.61           |
| 9   | Carbonic anhydrase 3                                    | P07451                 | 307          | 5.23 | 26      | 3.15E-01                | 48            | 1.04            | 0.0485  | 0.67605 | -2.74           |
| 10  | Carbonic anhydrase 3                                    | P07451                 | 1911         | 5.96 | 39      | <b>1.99E-18</b>         | 226           | -2.32           | 0.22228 | 0.04024 | 1.48            |
| 11  | Cofilin 2 (Muscle), isoform CRA_d                       | G3V5P4                 | 1396         | 6.57 | 40      | <b>3.97E-12</b>         | 163           | 1.65            | 0.45021 | 0.04577 | -1.3            |
| 12  | Creatine kinase M-type                                  | P06732                 | 232          | 5.2  | 43      | <b>6.29E-12</b>         | 155           | 1.1             | 0.02917 | 0.84146 | -2.09           |
| 13  | Creatine kinase M-type                                  | P06732                 | 1281         | 6.65 | 56      | <b>5.00E-37</b>         | 412           | -2.09           | 0.31114 | 0.04904 | 1.36            |
| 14  | Cytochrome b-c1 complex subunit Rieske, mitochondrial   | P47985                 | 1280         | 6.47 | 56      | <b>1.26E-04</b>         | 82            | -1.17           | 0.03556 | 0.53098 | 1.5             |
| 15  | DEAH (Asp-Glu-Ala-His) box polypeptide 35 (Fragment)    | Q5THQ9                 | 1919         | 6.64 | 25      | 6.29E+00                | 44            | -1.81           | 0.64737 | 0.049   | 1.32            |
| 16  | Desmin                                                  | P17661                 | 194          | 4.9  | 52      | <b>2.51E-85</b>         | 889           | 1.07            | 0.03127 | 0.60351 | 1.57            |
| 17  | Desmin                                                  | P17661                 | 190          | 5.09 | 52      | <b>3.97E-06</b>         | 97            | -2.98           | 0.67297 | 0.0126  | 5.38            |
| 18  | Desmin                                                  | P17661                 | 161          | 4.94 | 58      | <b>6.29E-29</b>         | 325           | 1.07            | 0.02834 | 0.47118 | -1.83           |
| 19  | DnaJ homolog subfamily C member 3                       | Q13217                 | 1778         | 6.16 | 12      | 6.29E+00                | 35            | -1.6            | 0.97308 | 0.04322 | 1.55            |
| 20  | EV15-like protein                                       | Q96CN4                 | 2392         | 8.65 | 16      | 1.99E+00                | 40            | 1.05            | 0.03606 | 0.68538 | -1.56           |
| 21  | Fructose-bisphosphate aldolase A                        | P04075                 | 2173         | 9.58 | 41      | <b>6.29E-29</b>         | 325           | -1              | 0.0297  | 0.92406 | 1.78            |
| 22  | Glycerol-3-phosphate dehydrogenase [NAD+], cytoplasmic  | P21695                 | 1460         | 6.12 | 34      | 5.00E-02                | 56            | 1.35            | 0.39966 | 0.02285 | -1.51           |
| 23  | Glycolipid transfer protein domain-containing protein 2 | A6NH11                 | 2060         | 9.17 | 60      | 5.00E+00                | 36            | -1.01           | 0.00039 | 0.82194 | -1.68           |
| 24  | Heat shock cognate 71 kDa protein                       | P11142                 | 129          | 5.06 | 70      | <b>1.99E-13</b>         | 170           | -1.87           | 0.98016 | 0.03882 | 1.65            |

|                                        |                                                                              |        |      |      |     |                 |     |           |           |           |           |
|----------------------------------------|------------------------------------------------------------------------------|--------|------|------|-----|-----------------|-----|-----------|-----------|-----------|-----------|
| 25                                     | Histidine protein methyltransferase 1 homolog                                | O95568 | 253  | 3.63 | 35  | 7.92E-01        | 44  | -1.45     | 0.24894   | 0.04389   | 1.8       |
| 26                                     | Histidine protein methyltransferase 1 homolog                                | O95568 | 1517 | 5.66 | 27  | 3.97E-01        | 47  | 1.7       | 0.08884   | 0.02778   | -2.15     |
| 27                                     | Histidine protein methyltransferase 1 homolog                                | O95568 | 1647 | 5.89 | 18  | 3.97E-01        | 47  | 2.22      | 0.80181   | 0.04677   | -3.4      |
| 28                                     | Histidine protein methyltransferase 1 homolog                                | O95568 | 66   | 5.07 | 130 | 7.92E-01        | 44  | -2.1      | 0.63497   | 0.01079   | 2.53      |
| 29                                     | Histidine protein methyltransferase 1 homolog                                | O95568 | 70   | 3.72 | 129 | 7.92E-01        | 44  | -1.63     | 0.51677   | 0.01018   | 2         |
| 30                                     | Histidine protein methyltransferase 1 homolog                                | O95568 | 149  | 5.1  | 65  | 9.98E+00        | 33  | -2.98     | 0.69976   | 0.00185   | 4.44      |
| 31                                     | Keratin, type II cytoskeletal 1                                              | P04264 | 62   | 5.19 | 135 | 2.51E-02        | 59  | -1.1      | 0.02247   | 0.64301   | -2.62     |
| 32                                     | Keratin, type II cytoskeletal 1                                              | P04264 | 2281 | 9.91 | 25  | <b>2.51E-04</b> | 79  | 1.5       | 0.18722   | 0.03796   | -2.55     |
| 33                                     | LIM domain-binding protein 3                                                 | O75112 | 2527 | 9.64 | 31  | 2.51E-03        | 69  | -1.2      | 0.02037   | 0.60566   | 2.21      |
| 34                                     | Myoglobin                                                                    | P02144 | 1708 | 6.36 | 16  | 3.15E-01        | 48  | 1.7       | 0.83927   | 0.01625   | -1.56     |
| 35                                     | Myoglobin                                                                    | P02144 | 2494 | 8.4  | 16  | 7.92E-02        | 54  | 1.1       | 0.02386   | 0.45031   | -1.59     |
| 36                                     | Myosin regulatory light chain 2, ventricular/cardiac muscle isoform          | P10916 | 370  | 3.25 | 19  | 3.97E-02        | 57  | 2.64      | 0.42875   | 0.0379    | -4.6      |
| 37                                     | Myosin-1                                                                     | P12882 | 1122 | 5.47 | 150 | 3.97E-02        | 57  | -3.42     | 0.3205    | 0.02464   | 1.81      |
| 38                                     | Phosphoglucosylase-1                                                         | P36871 | 151  | 5.16 | 62  | 3.97E-02        | 57  | 1.7       | 0.04417   | 0.79217   | -3.21     |
| 39                                     | Protein ALEX                                                                 | P84996 | 2121 | 8.87 | 47  | 9.98E+01        | 23  | -1.05     | 0.04195   | 0.73628   | -1.55     |
| 40                                     | Retinal dehydrogenase 1                                                      | P00352 | 1865 | 6.49 | 58  | 6.29E-03        | 65  | -2.22     | 0.87484   | 0.00736   | 2.32      |
| 41                                     | Serum albumin                                                                | P02768 | 1053 | 6.12 | 300 | <b>7.92E-06</b> | 94  | 1.36      | 0.93935   | 0.03639   | -1.5      |
| 42                                     | TNNT1 protein                                                                | Q3B759 | 1669 | 6.14 | 17  | <b>9.98E-04</b> | 79  | -1.59     | 0.45014   | 0.04551   | 1.36      |
| 43                                     | Tropomyosin alpha-3 chain                                                    | P06753 | 92   | 4.03 | 98  | <b>6.29E-12</b> | 155 | 1.82      | 0.04149   | 0.34539   | 1.89      |
| 44                                     | Tropomyosin alpha-3 chain                                                    | P06753 | 101  | 4.03 | 86  | <b>9.98E-27</b> | 303 | 1.19      | 0.03941   | 0.78602   | 3.47      |
| 45                                     | Tropomyosin beta chain                                                       | P07951 | 1126 | 5.51 | 139 | <b>5.00E-20</b> | 236 | 2.45      | 0.29052   | 0.01466   | -3.7      |
| 46                                     | Troponin T, slow skeletal muscle                                             | P13805 | 1456 | 6.23 | 34  | 5.00E-01        | 46  | 1.61      | 0.63826   | 0.03874   | -1.67     |
| 47                                     | Voltage-dependent anion-selective channel protein 2                          | P45880 | 2266 | 7.37 | 29  | 1.58E-01        | 51  | -1.09     | 0.02353   | 0.77362   | 2.47      |
| 48                                     | WD repeat-containing and planar cell polarity effector protein fritz homolog | O95876 | 2371 | 7.17 | 17  | 7.92E+00        | 34  | -1.76     | 0.63391   | 0.03279   | 3.09      |
| 49                                     | Zinc finger protein 394                                                      | Q53G13 | 1875 | 6.74 | 85  | 6.29E+00        | 35  | -1.01     | 0.01539   | 0.89004   | -2.11     |
| <b>NUMBERS OF SPOTS &lt;= Boundary</b> |                                                                              |        |      |      |     |                 |     | <b>14</b> | <b>19</b> | <b>30</b> | <b>23</b> |
| <b>NUMBERS OF SPOTS &gt;= Boundary</b> |                                                                              |        |      |      |     |                 |     | <b>14</b> |           |           | <b>19</b> |

#When multiple gel spots identify as one protein (as judged by accession number), each is included in the table because of the possibility that these could be isoforms.
